# Supplementary material for: Windmill-type molecules for efficient deep-blue organic light-emitting diodes via hybridized local and charge-transfer excited state
Source: Royal Society of Chemistry journal article supplement (doi:10.1039/d4tc01514b), 2024-01-01

# Windmill-Type Molecules for Efficient Deep-Blue Organic Light-Emitting Diodes via Hybridized Local and Charge-Transfer Excited-State

Huihui Li,<sup>a,‡</sup> Min Wang,<sup>b,‡</sup> Ziting Zhong,<sup>a</sup> Hua Lu,<sup>a,\*</sup> Zujin Zhao<sup>\*,b</sup> and Xin Jiang Feng<sup>\*,a</sup>

## I. Supplementary Figures and Tables.

|                                                                                                             |            |
|-------------------------------------------------------------------------------------------------------------|------------|
| 1. Fig. S1 Thermogravimetric analysis and differential scanning calorimetry traces.....                     | S2         |
| 2. Table S1 Photophysical properties of <b>2C2P</b> and <b>2D2P</b> in solvents.....                        | S2         |
| 3. Table S2 Stokes shifts vs orientation polarizability of <b>2C2P</b> and <b>2D2P</b> in solvents.....     | S3         |
| 4. Fig. S2 Lippert-Mataga plots of the enantiomers by Stokes' shifts versus solvent polarizability.....     | S3         |
| 5. Table S3 Photoluminescence properties of the dyes in PMMA film and in powder.....                        | S4         |
| 6. Table S4 TD-DFT calculation using the B3LYP functional with 6-31G(d,p) basis sets.....                   | S4         |
| 7. Fig. S3 Natural transition orbitals of $S_0$ to $S_{1/2/3}$ and $S_0$ to $T_{7/8}$ for <b>2C2P</b> ..... | S5         |
| 8. Fig. S4 Natural transition orbitals of $S_0$ to $S_{1/2/3}$ and $S_0$ to $T_{6/9}$ for <b>2D2P</b> ..... | S5         |
| 9. Fig. S5 Cyclic voltammograms curves of <b>2C2P</b> and <b>2D2P</b> .....                                 | S5         |
| 10. Table S5 CV and DFT calculations parameters of compounds.....                                           | S6         |
| 11. Fig. S6 Carrier mobility profiles for the emitters.....                                                 | S6         |
| 12. Fig. S7 Electroluminescence profiles for devices using <b>2D2P</b> as emitter.....                      | S7         |
| <b>II. General details and measurements specifications.....</b>                                             | <b>S9</b>  |
| <b>III. <sup>1</sup>H NMR of <b>2C2P</b> and <b>2D2P</b> in CD<sub>2</sub>Cl<sub>2</sub>.....</b>           | <b>S10</b> |
| <b>IV. HR-MS of <b>2C2P</b> and <b>2D2P</b>.....</b>                                                        | <b>S12</b> |

## I. Supplementary Figures and Tables.

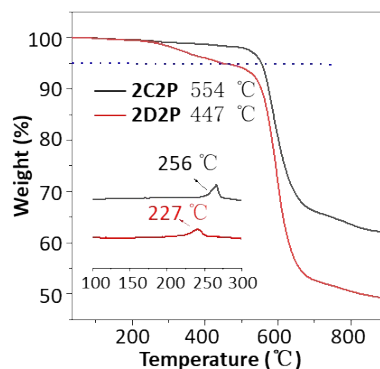

**Fig. S1** Thermogravimetric analysis (TGA) traces for **2C2P** and **2D2P**. Inset: differential scanning calorimetry (DSC) traces.

**Table S1** Photophysical properties of **2C2P** and **2D2P** in solvents.

|             | Solvent | $\lambda_{\text{abs}}^{\text{a}}$<br>(nm) | $\lambda_{\text{em}}^{\text{a}}$<br>(nm) | $\Delta\nu_{\text{em-abs}}^{\text{b}}$<br>( $\text{cm}^{-1}$ ) | $\Phi_{\text{F}}^{\text{c}}$ | $\tau_{\text{F}}^{\text{d}}$<br>(ns) | $K_{\text{r}}^{\text{e}}$<br>( $10^8 \text{ s}^{-1}$ ) | $K_{\text{nr}}^{\text{e}}$<br>( $10^8 \text{ s}^{-1}$ ) |
|-------------|---------|-------------------------------------------|------------------------------------------|----------------------------------------------------------------|------------------------------|--------------------------------------|--------------------------------------------------------|---------------------------------------------------------|
| <b>2C2P</b> | Hexane  | 380                                       | 415                                      | 2219                                                           | 0.66                         | 1.45                                 | 4.55                                                   | 2.34                                                    |
|             | Toluene | 365                                       | 418                                      | 3474                                                           | 0.84                         | 1.27                                 | 6.61                                                   | 1.26                                                    |
|             | DCM     | 363                                       | 429                                      | 4238                                                           | 0.91                         | 1.45                                 | 6.28                                                   | 0.62                                                    |
|             | THF     | 365                                       | 424                                      | 3812                                                           | 0.52                         | 1.44                                 | 3.61                                                   | 3.33                                                    |
|             | MeCN    | 340                                       | 413                                      | 5199                                                           | 0.49                         | 1.69                                 | 2.90                                                   | 3.02                                                    |
|             | DMF     | 364                                       | 442                                      | 4848                                                           | 0.16                         | 1.62                                 | 0.99                                                   | 5.19                                                    |
|             | MeOH    | 368                                       | 427                                      | 4803                                                           | 0.56                         | 1.70                                 | 3.29                                                   | 2.59                                                    |
| <b>2D2P</b> | Hexane  | 376                                       | 445                                      | 4124                                                           | 0.79                         | 1.36                                 | 5.81                                                   | 1.54                                                    |
|             | Toluene | 338                                       | 445                                      | 7114                                                           | 0.65                         | 2.73                                 | 2.38                                                   | 1.28                                                    |
|             | DCM     | 333                                       | 465                                      | 8525                                                           | 0.94                         | 4.85                                 | 1.94                                                   | 0.12                                                    |
|             | THF     | 336                                       | 459                                      | 7975                                                           | 0.86                         | 4.08                                 | 2.11                                                   | 0.34                                                    |
|             | MeCN    | 380                                       | 426                                      | 2842                                                           | 0.49                         | 1.03                                 | 4.76                                                   | 4.95                                                    |
|             | DMF     | 334                                       | 491                                      | 9574                                                           | 0.42                         | 7.51                                 | 0.56                                                   | 7.72                                                    |
|             | MeOH    | 348                                       | 445                                      | 6264                                                           | 0.59                         | 1.97                                 | 2.99                                                   | 2.08                                                    |

<sup>a</sup> Absorption and emission maxima. <sup>b</sup> Stokes-shift value. <sup>c</sup> Fluorescence quantum yield. <sup>d</sup> Fluorescence lifetime detected at the maximum fluorescence wavelengths. <sup>e</sup> Radiative and nonradiative constants calculated from fluorescence quantum yields and lifetimes.

**Table S2** Stokes shifts vs orientation polarizability of **2C2P** and **2D2P** in solvents.

|             | solvents           | $f(\epsilon, n)^a$ | $\nu_a(\text{nm})^b$ | $\nu_f(\text{nm})^b$ | $\nu_a - \nu_f(\text{cm}^{-1})^c$ |
|-------------|--------------------|--------------------|----------------------|----------------------|-----------------------------------|
| <b>2C2P</b> | toluene            | 0.0123             | 366                  | 435                  | 4330                              |
|             | triethylamine      | 0.0480             | 364                  | 432                  | 4320                              |
|             | butyl ether        | 0.0962             | 365                  | 432                  | 4250                              |
|             | ethyl ether        | 0.1670             | 330                  | 438                  | 4570                              |
|             | ethyl acetate      | 0.1996             | 364                  | 438                  | 4640                              |
|             | tetrahydrofuran    | 0.2095             | 364                  | 441                  | 4800                              |
|             | dimethyl formamide | 0.2760             | 362                  | 457                  | 5740                              |
|             | acetone            | 0.2843             | 363                  | 447                  | 5180                              |
| <b>2D2P</b> | toluene            | 0.0123             | 335                  | 460                  | 8110                              |
|             | triethylamine      | 0.0480             | 334                  | 451                  | 7770                              |
|             | butyl ether        | 0.0962             | 333                  | 455                  | 8050                              |
|             | ethyl ether        | 0.1670             | 330                  | 472                  | 7810                              |
|             | ethyl acetate      | 0.1996             | 331                  | 472                  | 9030                              |
|             | tetrahydrofuran    | 0.2095             | 335                  | 477                  | 8890                              |
|             | dimethyl formamide | 0.2760             | 334                  | 503                  | 10060                             |
|             | acetone            | 0.2843             | 332                  | 489                  | 9670                              |

<sup>a</sup> The orientation polarizability of solvents; <sup>b</sup> Absorption and emission maxima; <sup>c</sup> Stokes shifts.

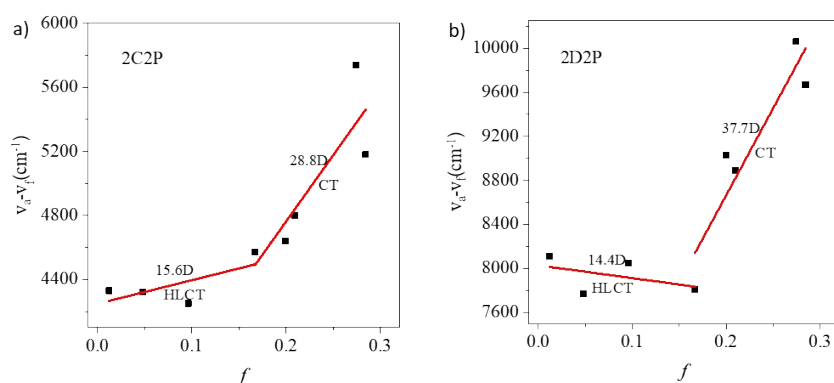

**Fig. S2** Lippert-Mataga plots of the enantiomers by Stokes' shifts versus solvent polarizability.

**Table S3** Photoluminescence properties of the dyes in PMMA film and in powder.

| $E_m/\Phi_F$ | Film        |             |          | Powder   |
|--------------|-------------|-------------|----------|----------|
|              | 10% in PMMA | 50% in PMMA | Neat     |          |
| <b>2C2P</b>  | 425/0.54    | 429/0.57    | 427/0.59 | 436/0.67 |
| <b>2D2P</b>  | 443/0.31    | 443/0.53    | 448/0.55 | 448/0.79 |

PMMA = poly (methacrylate)

**Table S4** Calculated excited wavelength ( $\lambda$ ), oscillator strengths ( $f$ ) and the related wave functions calculated by using the B3LYP functional with 6-31G(d,p) basis sets.

|             | State <sup>a</sup> | Energy <sup>b</sup> (eV) | $\lambda^c$ (nm) | $f^d$  | Wave function <sup>e</sup>   |
|-------------|--------------------|--------------------------|------------------|--------|------------------------------|
| <b>2C2P</b> | S <sub>1</sub>     | 3.27                     | 380              | 0.1141 | H→L (95%)                    |
|             | S <sub>2</sub>     | 3.38                     | 368              | 0.2799 | H-1→L (92%)                  |
|             | S <sub>3</sub>     | 3.43                     | 362              | 0.1605 | H-3→L (10%), H-2→L (83%)     |
|             | S <sub>4</sub>     | 3.54                     | 351              | 0.0586 | H-3→L (86%), H-2→L (10%)     |
|             | S <sub>5</sub>     | 3.76                     | 330              | 0.3942 | H→L+1 (27%), H→L+2 (47%)     |
|             | S <sub>6</sub>     | 3.76                     | 330              | 0.1945 | H→L+1 (47%), H→L+2 (23%)     |
|             | S <sub>7</sub>     | 3.82                     | 325              | 0.0558 | H-2→L+4 (16%), H→L (26%)     |
|             | S <sub>8</sub>     | 3.83                     | 324              | 0.0223 | H→L+4 (30%)                  |
|             | S <sub>9</sub>     | 3.87                     | 321              | 0.1924 | H-2→L+1 (21%), H-1→L+2 (32%) |
| <b>2D2P</b> | S <sub>1</sub>     | 3.07                     | 404              | 0.2608 | H→L (97%)                    |
|             | S <sub>2</sub>     | 3.24                     | 383              | 0.0533 | H-1→L (95%)                  |
|             | S <sub>3</sub>     | 3.40                     | 365              | 0.1571 | H-2→L (94%)                  |
|             | S <sub>5</sub>     | 3.56                     | 349              | 0.0426 | H-3→L (84%)                  |
|             | S <sub>6</sub>     | 3.60                     | 345              | 0.7426 | H→L+2 (96%)                  |
|             | S <sub>7</sub>     | 3.68                     | 338              | 0.0277 | H-1→L+1 (96%)                |
|             | S <sub>10</sub>    | 3.80                     | 327              | 0.0331 | H-2→L+1 (18%), H-1→L+2 (50%) |

<sup>a</sup> Excited state. <sup>b</sup> Calculated energy gaps. <sup>c</sup> Experimental absorption wavelengths <sup>d</sup> Oscillator strength (values < 0.02 are not included). <sup>e</sup> MOs involved in the transitions, H = HOMO, L = LUMO.

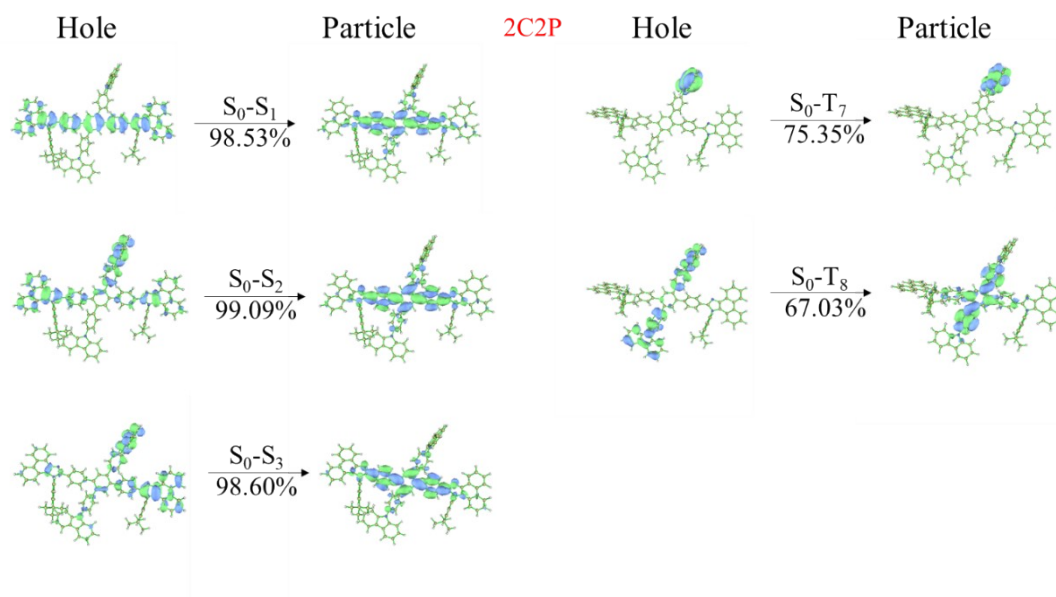

Fig. S3 Natural transition orbitals of  $S_0$  to  $S_{1/2/3}$  and  $S_0$  to  $T_{7/8}$  for **2C2P**.

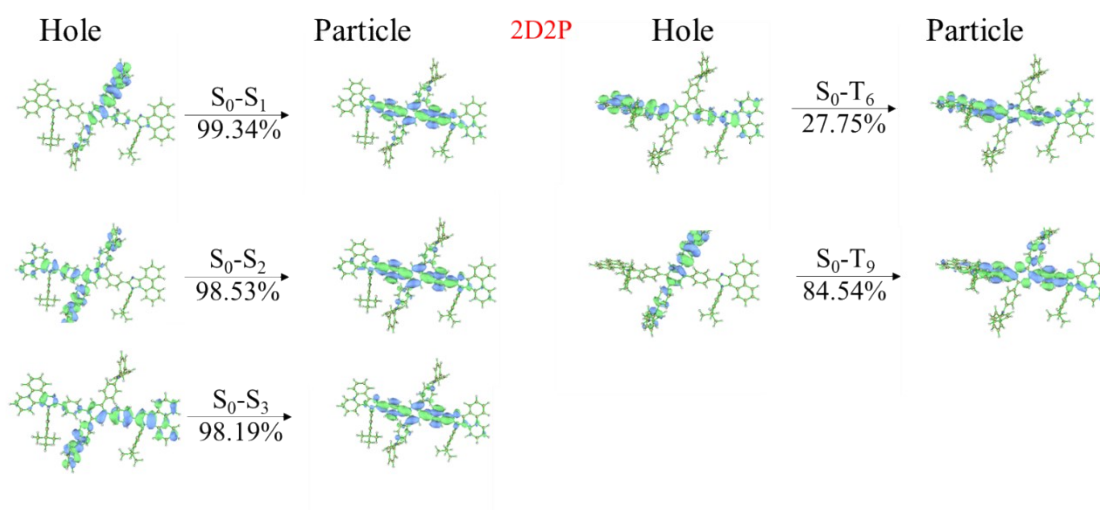

Fig. S4 Natural transition orbitals of  $S_0$  to  $S_{1/2/3}$  and  $S_0$  to  $T_{6/9}$  for **2D2P**.

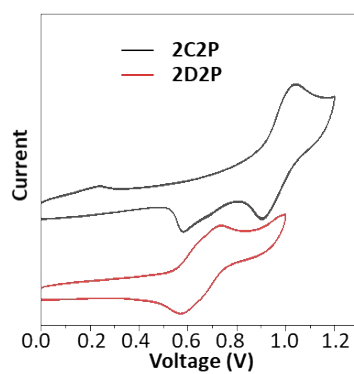

Fig. S5 Cyclic voltammograms curves of **2C2P** and **2D2P**.

**Table S5** CV and DFT calculations parameters of compounds

| Compounds   | $E_{\text{ox}}^{\text{a}}$ (V) | HOMO <sup>b, c</sup> (eV) | LUMO <sup>b, c</sup> (eV) | $E_{\text{g}}^{\text{opt d}}$ (eV) | $E_{\text{g}}^{\text{cal e}}$ (eV) |
|-------------|--------------------------------|---------------------------|---------------------------|------------------------------------|------------------------------------|
| <b>2C2P</b> | 0.89                           | -5.59/-5.18               | -2.52/-1.53               | 3.07                               | 3.65                               |
| <b>2D2P</b> | 0.53                           | -5.23/-4.91               | -2.19/-1.35               | 3.04                               | 3.46                               |

<sup>a</sup> Oxidation and reduction potentials from cyclic voltammetry. Ag/Ag<sup>+</sup> was used as reference. <sup>b</sup> HOMO was measured from the onset of oxidation curve. LUMO was calculated from HOMO and  $E_{\text{g}}$ . <sup>c</sup> Obtained from DFT calculations using b3lyp/6-31g(d,p). <sup>d</sup> Obtained from the cutoff of UV-Vis absorption spectra in DCM. <sup>e</sup> Calculated from the HOMO and LUMO.

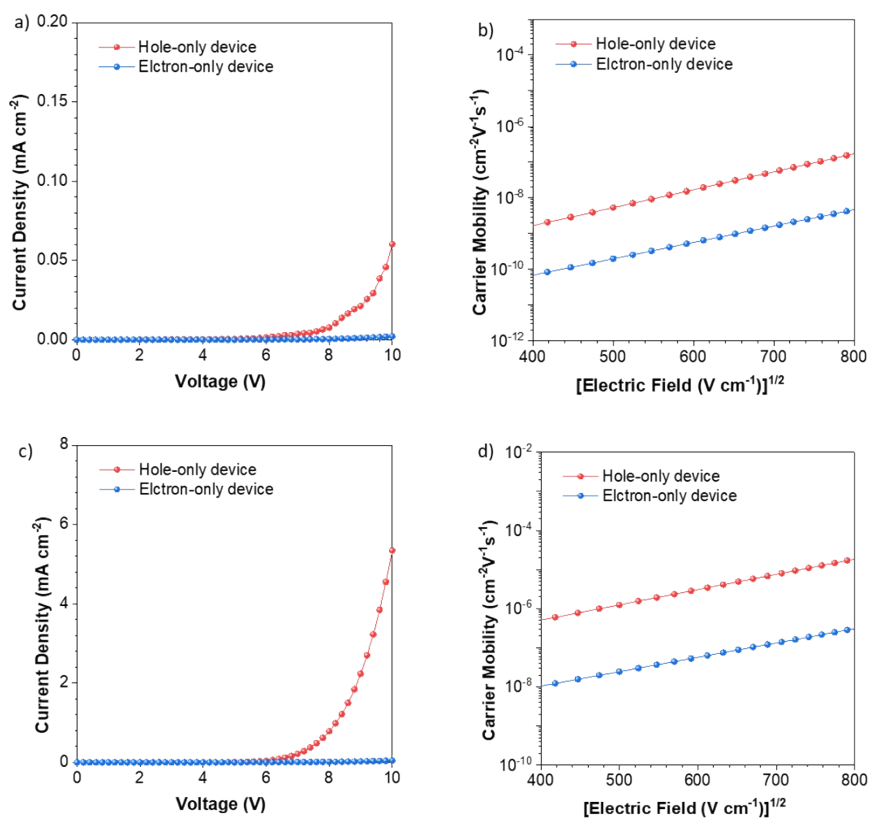

**Fig. S6** a, c) J–V curves of the electron-only device (EOD) and hole-only device (HOD) for **2C2P** and **2D2P**, respectively. b, d) Carrier mobility–electric field curves of **2C2P** and **2D2P**, respectively.

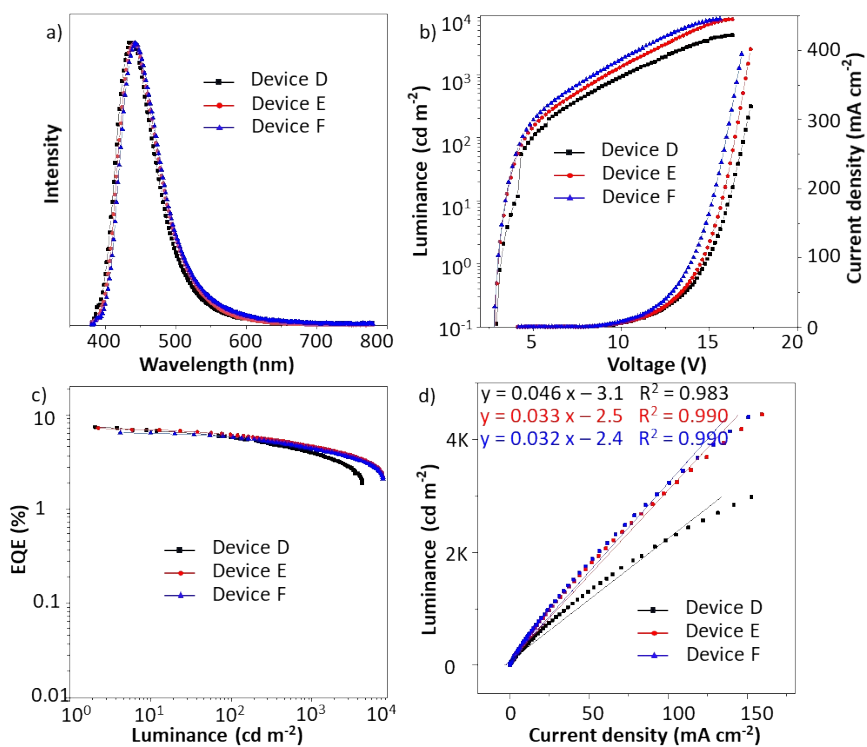

**Fig. S7** a) EL spectra of OLEDs for device D–F. b) Luminance and current density vs voltage. c) EQE vs luminance. d) Luminance vs current density (symbol) and the fitted curve plot (line) for device D–F.

## II. General details and measurements specifications

### *Photophysical, thermal and electrochemical property measurements*

$^1\text{H}$  and  $^{13}\text{C}$  NMR spectra were recorded on a Bruker AM 400/500 spectrometer. Mass spectrometric measurements were recorded using a MicroQII mass spectrometer. The differential scanning calorimetry (DSC) analysis was performed with  $10\text{ }^\circ\text{C min}^{-1}$  heating rate under nitrogen flushing using a TA Instruments DSC 2920. Thermogravimetric analysis was undertaken using a TGA instrument (PE-TGA6) with  $20\text{ }^\circ\text{C min}^{-1}$  heating rate under nitrogen. UV-Vis spectra were recorded using a Shimadzu UV-1800 spectrophotometer. Samples for absorption and emission measurements were contained in  $1\times 1\text{ cm}$  quartz cuvettes. Dilute solution with an absorbance of less than 0.05 at the excited wavelength was used for the measurement of fluorescent quantum yields, and the absolutely quantum yields of the materials were determined with a Hamamatsu C13534 spectrometer. Cyclic voltammetric (CV) measurements were carried out in a conventional three-electrode cell, using a Pt button working electrode, a platinum wire counter electrode, and an  $\text{Ag}/\text{AgNO}_3$  reference electrode using a computer-controlled CHI650E at room temperature in dichloromethane (for oxidation) or dimethylformamide (for reduction) containing  $\text{Bu}_4\text{NPF}_6$  (0.1 M) as the supporting electrolyte.

### *Device fabrication and EL performance measurements*

Glass substrates pre-coated with a 90 nm-thin layer of indium tin oxide (ITO) with a sheet resistance of  $15\text{--}20\ \Omega$  per square were thoroughly cleaned for 10 minutes in ultrasonic bath of acetone, isopropyl alcohol, detergent, deionized water, and isopropyl alcohol and then treated with  $\text{O}_2$  plasma for 10 min in sequence. All of the organic materials used were purified by a vacuum sublimation approach. Organic layers were deposited onto the ITO-coated substrates by high-vacuum ( $< 5\times 10^{-4}\text{ Pa}$ ) thermal evaporation. Deposition rates were controlled by independent quartz crystal oscillators, which are  $1\text{--}2\ \text{\AA s}^{-1}$  for organic materials,  $0.1\ \text{\AA s}^{-1}$  for LiF, and  $5\ \text{\AA s}^{-1}$  for Al, respectively. The emission area of the devices is  $3\text{ mm}\times 3\text{ mm}$  as shaped by the overlapping area of the anode and cathode. All the device characterization steps were carried out at room temperature under ambient laboratory conditions without encapsulation. EL spectra were taken by normal direction utilizing a spectrometer (Ocean Optics USB 2000+). Luminance–voltages– current density characteristics were measured by PIN-25D silicon photodiode, along with a Keithley 2400 Source Meter. The external quantum efficiencies were estimated utilizing the normalized EL spectra and the current efficiencies of the devices, assuming that the devices are Lambertian emitters.



### *Carrier mobility calculation*

The SCLC property can be described via the *Mott-Gurney* equation (1), and the carrier mobility ( $\mu$ ) of the organic semiconductor can be calculated according to the following Equation (2) (*Poole-Frenkel* formula), where the  $\epsilon_0$  is the vacuum permittivity ( $8.85 \times 10^{-14} \text{ C V}^{-1} \text{ cm}^{-1}$ ),  $\epsilon_r$  is the relative dielectric constant (supposed to be 3.0 for organic semiconductor),  $E$  stands for the strength of electric field,  $L$  is the thickness of emitter,  $\mu_0$  is the zero-field mobility, and  $\gamma$  is the *Poole-Frenkel* factor. By fitting the current density–voltage ( $J$ – $V$ ) curves in SCLC region to Equation (2), the  $\mu_0$  and  $\gamma$  values are obtained, thus generating the field-dependent electron mobility according to Equation (2).

$$J = \frac{9}{8} \epsilon_0 \epsilon_r \mu \frac{E^2}{L} = \frac{9}{8} \epsilon_0 \epsilon_r \frac{V^2}{L^3} \mu_0 \exp\left(0.891\gamma \sqrt{\frac{V}{L}}\right) \quad (1)$$

$$\mu = \mu_0 \exp(\gamma \sqrt{E}) \quad (2)$$

### *Horizontal dipole ratio measurement*

For the measurement of the orientation of emitting dipole in molecule, a setup RSQX-01 made by the Changchun Ruoshui Technology Development Co. Ltd. was used. The dipole orientations of doped film were determined by angle-resolved and polarization resolved PL on a half quartz cylinder prism. A continuous-wave He:Cd laser (325 nm) with a fixed angle of  $45^\circ$  to the substrate was employed as excitation source. *p*-Polarized emitted light was detected at the respective peak wavelength of the PL spectrum of each film.

### III. <sup>1</sup>H NMR spectra of the compounds in CD<sub>2</sub>Cl<sub>2</sub>

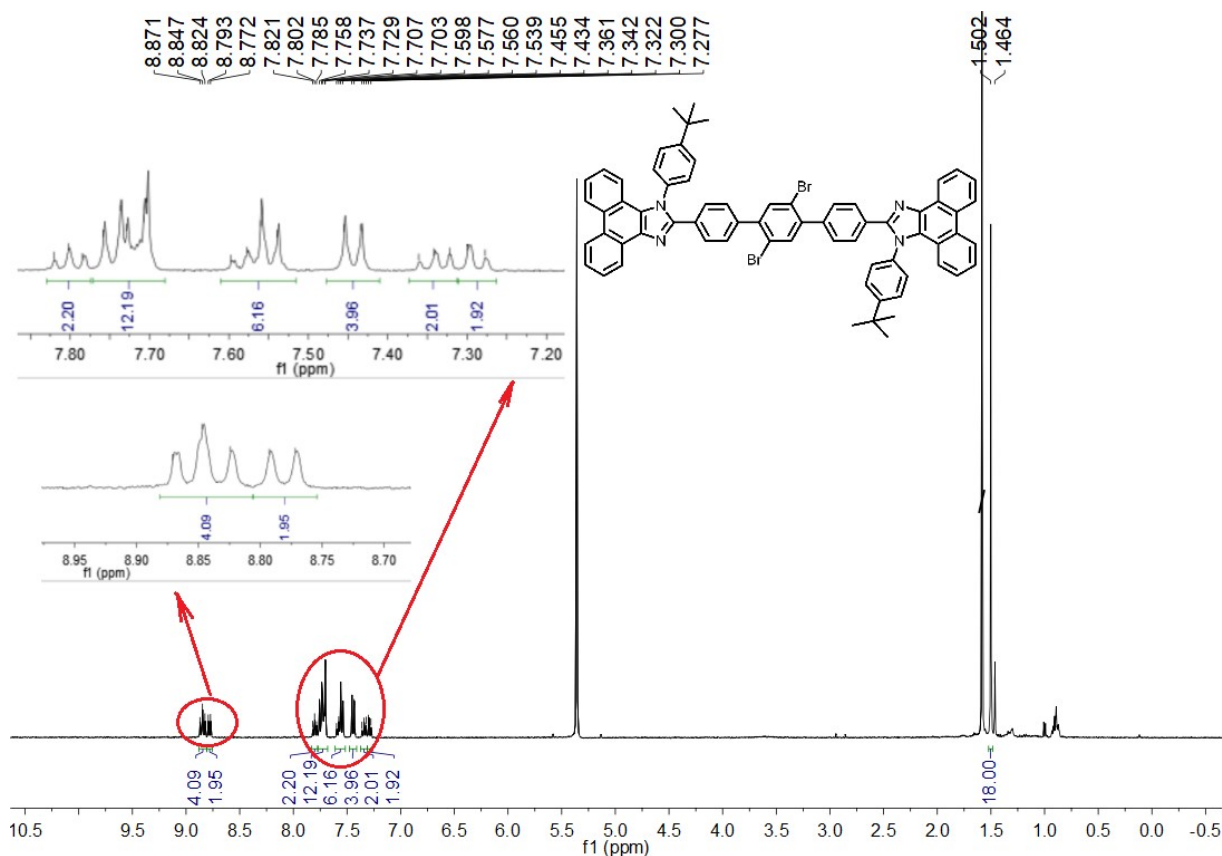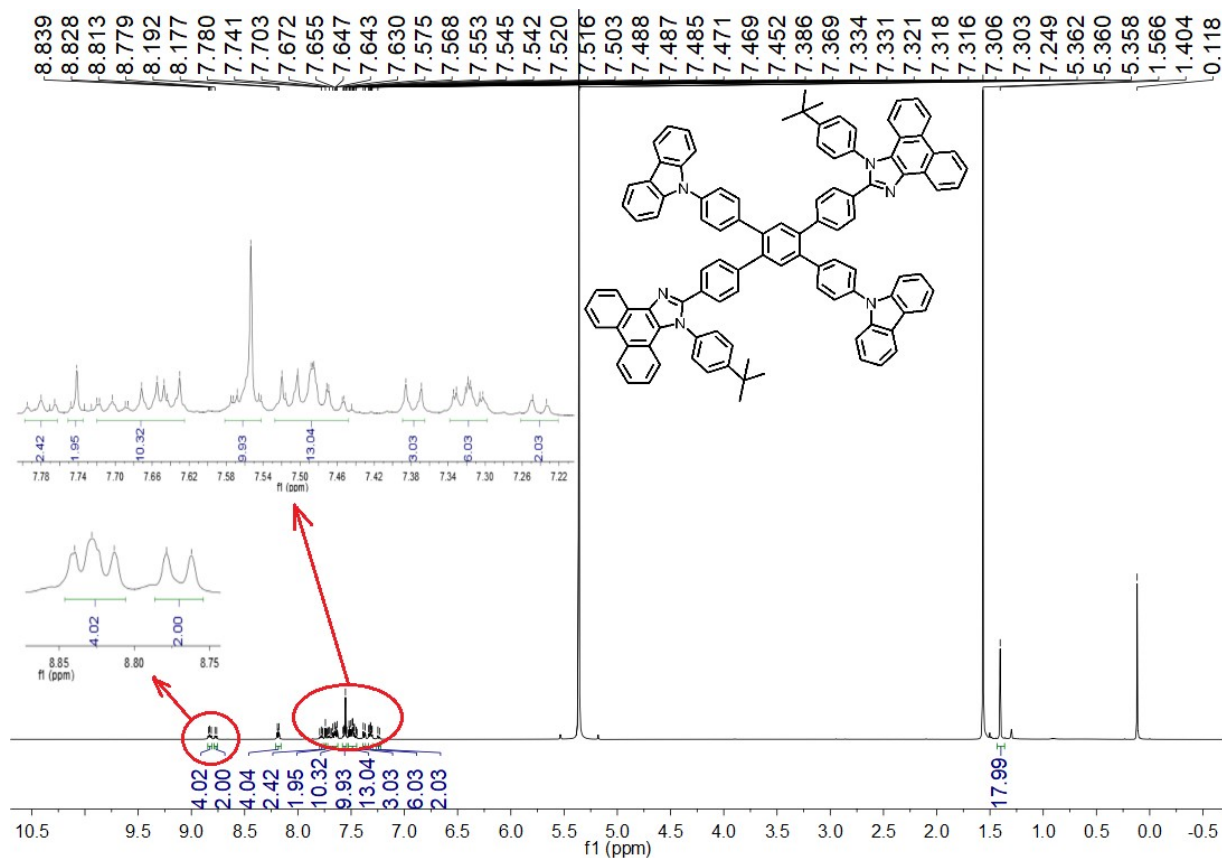

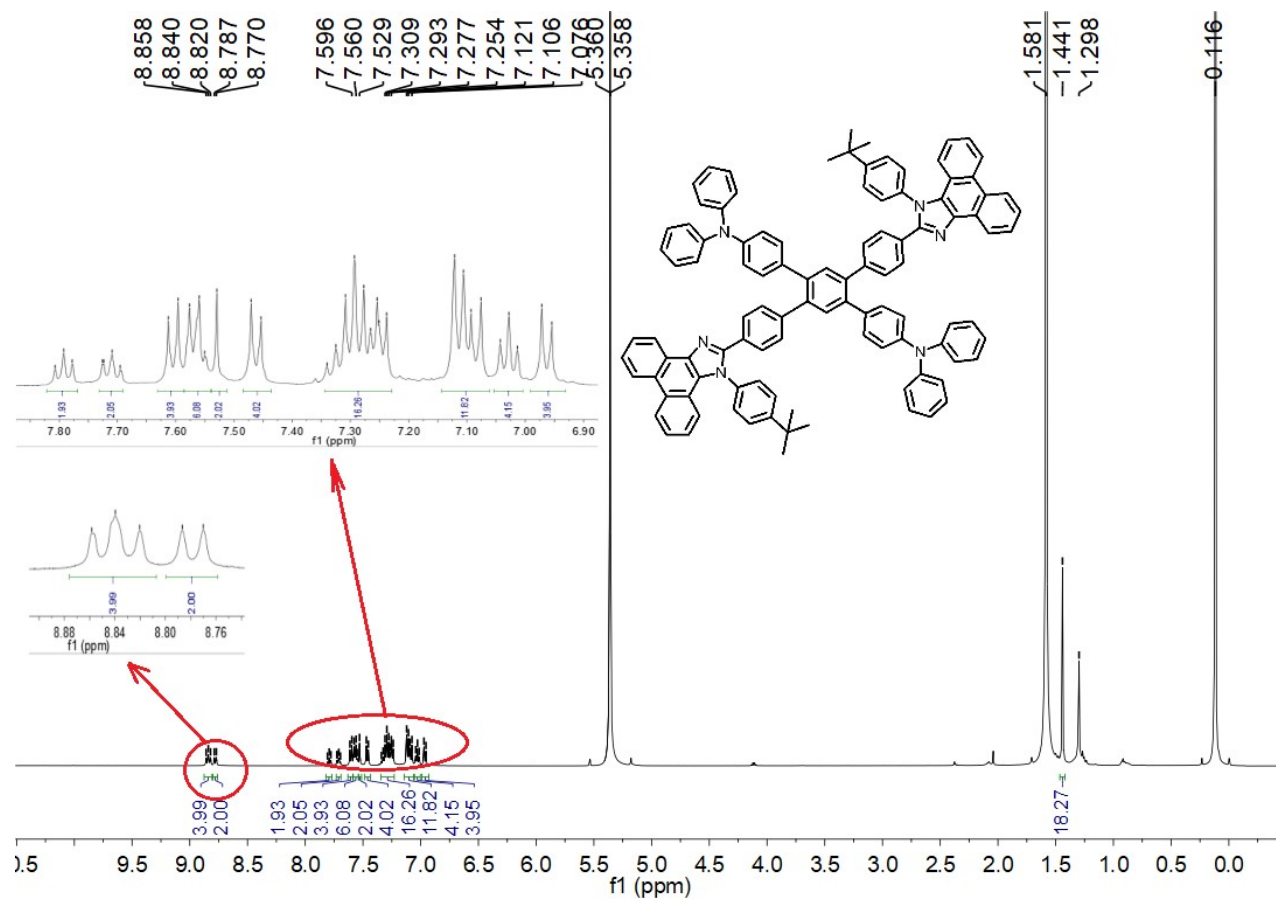

#### IV. HR-MS spectra of the target molecules

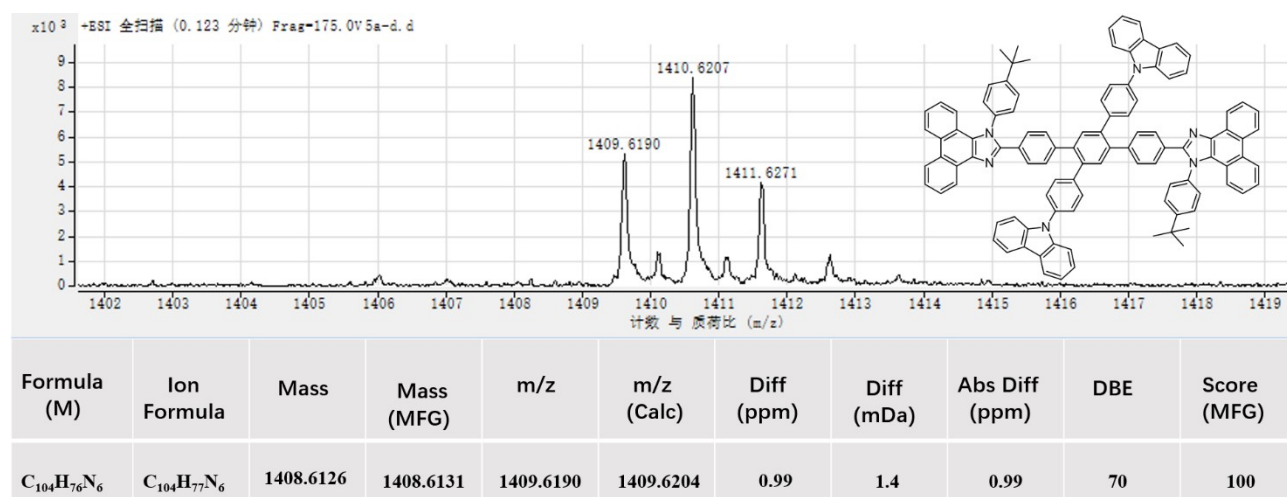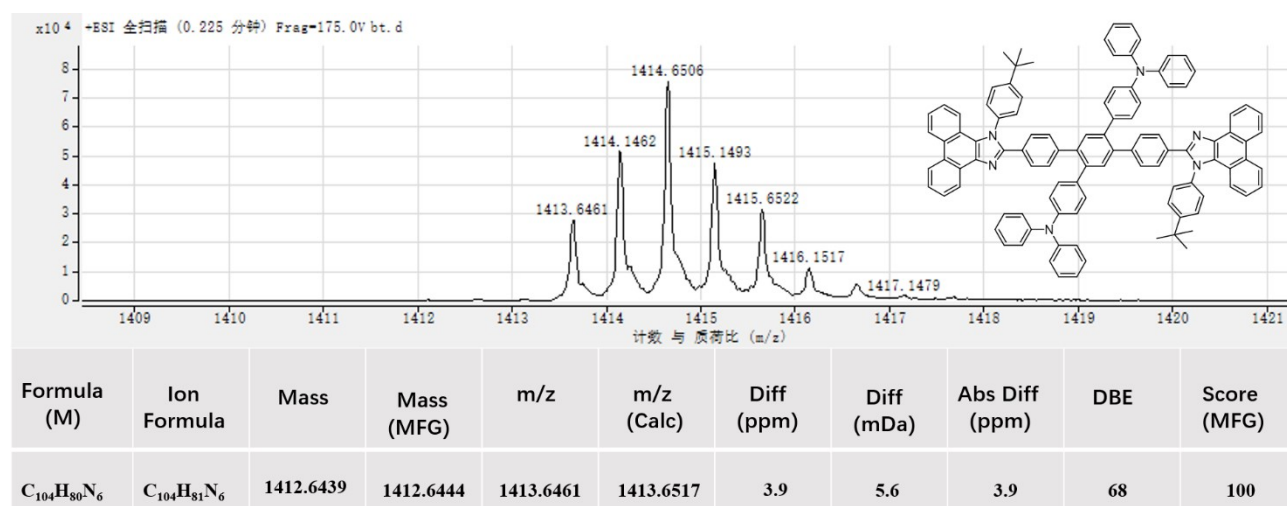

Supplement: d4tc01514b1.pdf [file d4tc01514b1.pdf]
